# Supplementary material for: An Estimate of the Total DNA in the Biosphere
Source: PLoS Biol. 2015 Jun 11;13(6):e1002168. doi: 10.1371/journal.pbio.1002168 (PMC4466264; doi:10.1371/journal.pbio.1002168)
Supplement: S1 Table — The total weights of termites, fish, and krill were calculated using density estimates; hence values of the numbers of individuals and mass of individuals are not included. (XLSX) [file pbio.1002168.s004.xlsx]

## Sheet: Sheet1
	Table S1. Table of animal number counts and biomass estimates.
		Individuals	Mass/individual [kg]	Total weight (g)	Total cells	Genome size [Mb]	DNA amount [Mb]
	Humans	7140000000	70	499480000000000	4.9948e+23	3423	1.70972e+27
	Cattle	1530000000	635	971594000000000	9.71594e+23	3537.1	3.43663e+27
	Sheep and goats	1750000000	56.7	99200000000000	9.92233e+22	3030.4	3.00686e+26
	Chickens	19000000000	2.336	44384000000000	4.4384e+22	1222.5	5.42594e+25
	Pigs	1000000000	113.4	113398000000000	1.13398e+23	3097.8	3.51286e+26
	Ants	1000000000000000	5e-06	5000000000000	5e+21	381.9	1.90937e+24
	Termites			444720000000000	4.4472e+23	1220.4	5.42738e+26
	Fish			3.6e+16	3.6e+25	2154	7.75439e+28
	Krill			379000000000000	3.79e+23	29002.6	1.0992e+28
	Insects	9e+18	1e-05	9e+16	9e+25	1297.7	1.16796e+29
	Birds	300000000000	1.168	350400000000000	3.504e+23	1359.7	4.76449e+26
						sum [Mb]:	2.12206e+29
