# Supplementary material for: An Estimate of the Total DNA in the Biosphere
Source: PLoS Biol. 2015 Jun 11;13(6):e1002168. doi: 10.1371/journal.pbio.1002168 (PMC4466264; doi:10.1371/journal.pbio.1002168)
Supplement: S3 Table — The uncertainty for the quartiles was achieved by taking the difference between each quartile and the mean, represented here. The standard deviation listed is the standard deviation of a smaller, symmetric range around the mean. The exception to these uncertainties is prokaryotes, where the first and second uncertainties correspond to the Kallmeyer et al. and Whitman et al. ranges, respectively. (XLSX) [file pbio.1002168.s006.xlsx]

## Sheet: Sheet1
	Table S3. Table including all uncertainties.
		DNA amount [Mb]	Q_1 [Mb]	Q_3 [Mb]	St.dev. [Mb]	Original data type	DNA amount [Mb]	Q_1 [Mb]	Q_3 [Mb]	St.dev. [Mb]	Original data type
	Unicellular eukaryotes	1.31e+29	9.46e+28	3.41e+28	2.94e+28	Density of individuals	5e+28				Individuals per teaspoon soil
	Fungi	1.73e+27	3.37e+27	1.74e+27	3.35e+27	Biomass density	8.76e+25	3.75e+25	1.92e+25	3.29e+25	Biomass per g organic matter
	Prokaryotes	1.61e+31	1.05e+31	1.06e+31		Genome size from PFGE	1.77e+31	1.03e+31	1.04e+31		Genome size from sequencing
	Viruses	3.95e+29	3.41e+29	3.5e+28	4.25e+28	Total no. in biosphere
	Animals	4.24e+29	1.52e+29			Individuals per subgroup	3.67e+29	3.97e+29	3.16e+29	3.06e+29	Biomass density
	Plants	3.65e+31	3.39e+31	1.4e+31	1.27e+31	Uncertainties from biomass st.dev		3.45e+31	1.54e+31	1.43e+31	Uncertainties from biomass range
	Total	5.35e+31	3.55e+31
